# Supplementary material for: Appraisal of Environmental Health and Ecohydrology of Free-Flowing Aghanashini River, Karnataka, India
Source: MDPI journal article supplement (doi:10.3390/w14060977), 2022-03-20
Supplement: s1 [file s1]

## Supplementary Materials

**Table S1.** Details of data with sources

| Data details                                                                                                | Source                                                                                                                                                                                                                                                                                                                                                                                                                                                                                                                                                                                                                                                                                                                                                                                                                                                                                                                                                                                                                                                                                                                                                                                                                                                                                                                                                                                                                                              |
|-------------------------------------------------------------------------------------------------------------|-----------------------------------------------------------------------------------------------------------------------------------------------------------------------------------------------------------------------------------------------------------------------------------------------------------------------------------------------------------------------------------------------------------------------------------------------------------------------------------------------------------------------------------------------------------------------------------------------------------------------------------------------------------------------------------------------------------------------------------------------------------------------------------------------------------------------------------------------------------------------------------------------------------------------------------------------------------------------------------------------------------------------------------------------------------------------------------------------------------------------------------------------------------------------------------------------------------------------------------------------------------------------------------------------------------------------------------------------------------------------------------------------------------------------------------------------------|
| Multi Temporal Optical Remote Sensing Data: 1973 and 2018 from Landsat 1 and Landsat 8                      | United States Geological Survey (USGS)<br>Downloaded from [47] <a href="https://www.usgs.gov/core-science-systems/nli/landsat/landsat-data-access?qt-science_support_page_related_con=0#qt-science_support_page_related_con">https://www.usgs.gov/core-science-systems/nli/landsat/landsat-data-access?qt-science_support_page_related_con=0#qt-science_support_page_related_con</a>                                                                                                                                                                                                                                                                                                                                                                                                                                                                                                                                                                                                                                                                                                                                                                                                                                                                                                                                                                                                                                                                |
| Training data – for remote sensing data classification (LU analysis)                                        | Collected from field using pre-calibrated handheld Global Positioning System [GPS]                                                                                                                                                                                                                                                                                                                                                                                                                                                                                                                                                                                                                                                                                                                                                                                                                                                                                                                                                                                                                                                                                                                                                                                                                                                                                                                                                                  |
| Topographic Sheet 1: 50000: For delineation of catchments and administrative boundaries                     | Survey of India [43]<br><a href="http://www.soinakshre.uk.gov.in/">http://www.soinakshre.uk.gov.in/</a>                                                                                                                                                                                                                                                                                                                                                                                                                                                                                                                                                                                                                                                                                                                                                                                                                                                                                                                                                                                                                                                                                                                                                                                                                                                                                                                                             |
| Virtual Globe data: Google Earth and Bhuvan                                                                 | Google Earth [54],<br><a href="https://www.google.com/intl/en_in/earth/">https://www.google.com/intl/en_in/earth/</a><br>Bhuvan, National Remote Sensing Centre [56] <a href="http://bhuvan.nrsc.gov.in/">http://bhuvan.nrsc.gov.in/</a>                                                                                                                                                                                                                                                                                                                                                                                                                                                                                                                                                                                                                                                                                                                                                                                                                                                                                                                                                                                                                                                                                                                                                                                                            |
| Long term Rainfall data : 1901 to 2010 across multiple rain gauge stations within and outside the catchment | India Meteorological Department (IMD) [49],<br><a href="http://www.imd.gov.in/pages/services_hydromet.php">http://www.imd.gov.in/pages/services_hydromet.php</a><br><br>Karnataka State Natural Disaster Monitoring Centre (KSNDMC),<br><a href="https://www.ksndmc.org/default.aspx">https://www.ksndmc.org/default.aspx</a><br>Global Precipitation Climatology Centre (GPCC) [48]<br><a href="https://www.esrl.noaa.gov/psd/data/gridded/data.cpc.globalprecip.html">https://www.esrl.noaa.gov/psd/data/gridded/data.cpc.globalprecip.html</a>                                                                                                                                                                                                                                                                                                                                                                                                                                                                                                                                                                                                                                                                                                                                                                                                                                                                                                   |
| Evapotranspiration (AET)                                                                                    | Actual Evapotranspiration (AET) using modified Hargreaves Method [56]<br>$AET = PET * K_c$<br>where $K_c$ is the evapotranspiration coefficient based on land uses (Built-up (0.15), Water (1.05), Open space (0.30), Evergreen forest (0.95), Scrub and grassland (0.80), Forest Plantation (0.85), Agriculture Plantation (0.80), Deciduous forest (0.85)), and PET:<br>Potential evapotranspiration<br>$PET = 0.0023 * (R_a / \lambda) * \sqrt{T_{max} - T_{min}} * \left( \frac{T_{max} + T_{min}}{2} + 17.8 \right)$<br>$T_{max}$ : Maximum temperature; $T_{min}$ : Minimum temperature; $\lambda$ : latent heat of vapourisation of water (2.501 MJ/kg) and $R_a$ : Extra-terrestrial radiation (MJ/m <sup>2</sup> /day)<br>$R_a$ is as per Indian Agriculture Research Institute, <a href="http://www.iari.res.in">http://www.iari.res.in</a> ,<br><a href="http://wgbis.ces.iisc.ernet.in/energy/paper/prospects_of_solar_energy/analysis.htm">http://wgbis.ces.iisc.ernet.in/energy/paper/prospects_of_solar_energy/analysis.htm</a><br><a href="http://wgbis.ces.iisc.ac.in/energy/water/paper/ETR91/SCR48_ETR91_CESTVR_Yettinhole-final.pdf">http://wgbis.ces.iisc.ac.in/energy/water/paper/ETR91/SCR48_ETR91_CESTVR_Yettinhole-final.pdf</a><br><a href="http://www.fao.org/docrep/X0490E/x0490e07.htm#latent%20heat%20of%20vaporization%20(l)">http://www.fao.org/docrep/X0490E/x0490e07.htm#latent heat of vaporization (l)</a> [51] |
| Temperature Data: Long term average (1950 – 2010)                                                           | WorldClim [52], <a href="http://www.worldclim.org">http://www.worldclim.org</a>                                                                                                                                                                                                                                                                                                                                                                                                                                                                                                                                                                                                                                                                                                                                                                                                                                                                                                                                                                                                                                                                                                                                                                                                                                                                                                                                                                     |
| Population Census: 1991, 2001, 2011                                                                         | Census of India [45], <a href="http://www.censusindia.gov.in">http://www.censusindia.gov.in</a>                                                                                                                                                                                                                                                                                                                                                                                                                                                                                                                                                                                                                                                                                                                                                                                                                                                                                                                                                                                                                                                                                                                                                                                                                                                                                                                                                     |
| Domestic water demand                                                                                       | The amount of water required per person includes water needed for bathing, washing, drinking, and other basic needs. Domestic water demand is assessed as the function of water requirements per person per day, population, and season (Summer: 150 litres per person per day (lpcd), Monsoon: 125 lpcd, and winter: 135 lpcd).                                                                                                                                                                                                                                                                                                                                                                                                                                                                                                                                                                                                                                                                                                                                                                                                                                                                                                                                                                                                                                                                                                                    |
| Livestock Census: 2012                                                                                      | District at a Glance [50]<br>Directorate of Economics and Statistics <a href="http://des.kar.nic.in/">http://des.kar.nic.in/</a>                                                                                                                                                                                                                                                                                                                                                                                                                                                                                                                                                                                                                                                                                                                                                                                                                                                                                                                                                                                                                                                                                                                                                                                                                                                                                                                    |
| Livestock water demand                                                                                      | Livestock population details were obtained from the district statistics office [50]. The water requirement for different animals was quantified based on the interviews: cattle (summer: 100 lpcd, monsoon: 70 lpcd, and winter: 85 lpcd), buffalo (summer: 105 lpcd, monsoon: 75 lpcd, and winter: 95 lpcd), sheep, and goats (summer: 22 lpcd, monsoon: 15 lpcd, and winter: 20 lpcd)                                                                                                                                                                                                                                                                                                                                                                                                                                                                                                                                                                                                                                                                                                                                                                                                                                                                                                                                                                                                                                                             |
| Agriculture Cropping Pattern and Water Requirement                                                          | Department of Agriculture [50]<br>Directorate of Economics and Statistics, <a href="http://des.kar.nic.in/">http://des.kar.nic.in/</a><br><a href="https://eands.dacnet.nic.in/">https://eands.dacnet.nic.in/</a><br>The crop water requirement for various crops was estimated considering their growth phase and details of the cropping pattern in the catchment (based on the data compiled                                                                                                                                                                                                                                                                                                                                                                                                                                                                                                                                                                                                                                                                                                                                                                                                                                                                                                                                                                                                                                                     |

|  |                                                                                                            |
|--|------------------------------------------------------------------------------------------------------------|
|  | from household surveys and publications such as the district at a glance, Department of Agriculture [50]). |
|--|------------------------------------------------------------------------------------------------------------|

**Table S2.** Category-wise land use (with accuracy assessment) and forest fragmentation extent (in percentage).

| LU Category                        | 1973  | 2018  | Accuracy (%) |      |      |      | Forest fragmentation type | 1973  | 2018  |
|------------------------------------|-------|-------|--------------|------|------|------|---------------------------|-------|-------|
|                                    |       |       | 1973         |      | 2018 |      |                           |       |       |
|                                    |       |       | UA           | PA   | UA   | PA   |                           |       |       |
| Evergreen to semi-evergreen forest | 71.65 | 23.95 | 57.3         | 57.4 | 97.0 | 96.8 | Interior Forest           | 66.3  | 17.8  |
| Moist deciduous forest             | 10.26 | 26.11 | 75.9         | 75.9 | 96.6 | 97.0 |                           |       |       |
| Dry deciduous forest               | 0.15  | 0.61  | 82.8         | 82.8 | 98.3 | 97.2 | Patch                     | 0.41  | 3.94  |
| Scrub forest/grass land            | 4.00  | 0.12  | 71.0         | 70.9 | 94.0 | 98.5 |                           |       |       |
| Forest Plantations                 | 3.52  | 11.64 | 76.6         | 76.6 | 78.5 | 99.9 | Transitional              | 2.63  | 8.23  |
| Cropland                           | 4.46  | 16.18 | 95.4         | 95.4 | 92.8 | 82.8 |                           |       |       |
| Horticulture Crops                 | 3.63  | 10.39 | 72.8         | 72.8 | 97.0 | 90.2 | Edge                      | 2.54  | 0.93  |
| Open fields                        | 1.41  | 3.44  | 66.8         | 66.8 | 98.9 | 98.4 |                           |       |       |
| Built-up                           | 0.09  | 4.88  | 83.7         | 83.8 | 98.1 | 92.4 | Perforated                | 14.2  | 19.8  |
| Water                              | 0.83  | 2.69  | 63.6         | 63.6 | 89.2 | 98.3 |                           |       |       |
| Overall Accuracy (%)               |       |       | 89.77        |      | 91   |      | Non-forest                | 13.94 | 49.34 |
| Kappa                              |       |       | 0.8          |      | 0.89 |      |                           |       |       |

Note - UA: User accuracy, PA: Producer accuracy, LU: land use

**Table S3.** Sub-basin wise forests and eco-hydrological status.

| SB id | Rainfall (mm) | Area - sq.km | Total Forest | Evergreen Forest | Moist Deciduous Forest | Infiltration (mm) | AET (mm) | Eco-hydro index (EHI) |
|-------|---------------|--------------|--------------|------------------|------------------------|-------------------|----------|-----------------------|
| 1     | 2073          | 175.0        | 52%          | 21%              | 31%                    | 1305.8            | 1512.8   | 0.86                  |
| 2     | 2960          | 253.3        | 57%          | 16%              | 41%                    | 1993.2            | 1490.5   | 1.34                  |
| 3     | 2370          | 31.2         | 53%          | 46%              | 7%                     | 1589.9            | 1500.7   | 1.06                  |
| 4     | 2931          | 150.1        | 52%          | 47%              | 5%                     | 1922.9            | 1484.9   | 1.29                  |
| 5     | 3561          | 173.1        | 60%          | 52%              | 8%                     | 2463.5            | 1476.4   | 1.67                  |
| 6     | 3753          | 168.4        | 87%          | 60%              | 28%                    | 3038.5            | 1475.1   | 2.06                  |
| 7     | 3425          | 134.1        | 68%          | 43%              | 25%                    | 2489.4            | 1487.5   | 1.67                  |
| 8     | 3169          | 109.7        | 88%          | 66%              | 22%                    | 2550.6            | 1483.8   | 1.72                  |
| 9     | 2944          | 253.7        | 27%          | 11%              | 16%                    | 1803.4            | 1466.2   | 1.23                  |

**Table S4:** Average values of physicochemical parameters at different sampling sites.

|      | WT    | TDS   | EC     | pH   | TB    | DO   | BOD   | COD   | TA     | Cl    | TH    | Ca    | Mg   | OP   | Nitrate | Na    | K    | Discharge |
|------|-------|-------|--------|------|-------|------|-------|-------|--------|-------|-------|-------|------|------|---------|-------|------|-----------|
| YK   | 24.63 | 71.77 | 139.62 | 8    | 5.07  | 6.97 | 13.2  | 24.05 | 109.86 | 17.88 | 77.53 | 21.55 | 5.81 | 0.2  | 0.18    | 8.6   | 0.69 | 27.43     |
| YNK  | 25.07 | 40.86 | 78.28  | 7.8  | 23.85 | 7.05 | 14.05 | 26.63 | 76.19  | 17.74 | 37.26 | 8.87  | 3.69 | 0.35 | 0.2     | 11.38 | 0.88 | 40.53     |
| BGT  | 28.2  | 35.59 | 70.09  | 7.53 | 8.25  | 6.3  | 16.19 | 32.76 | 77.33  | 20.06 | 34.1  | 7.68  | 3.64 | 0.17 | 0.16    | 11.85 | 0.87 | 37.63     |
| BE   | 26.33 | 30.63 | 56.68  | 7.37 | 6.18  | 6.29 | 22    | 33.78 | 58.36  | 18.29 | 25    | 4.87  | 3.13 | 0.21 | 0.18    | 9.25  | 0.74 | 10.03     |
| AGT2 | 27.43 | 45.34 | 87.95  | 7.47 | 13.83 | 6.2  | 13.12 | 26.38 | 73.62  | 17.88 | 38.57 | 9.05  | 3.89 | 0.22 | 0.18    | 10.66 | 1.01 | 31.97     |
| AG   | 27.5  | 19.9  | 39.4   | 6.9  | 6.67  | 6.23 | 18.49 | 31.89 | 52     | 17.61 | 15.2  | 2.89  | 1.95 | 0.29 | 0.13    | 9.14  | 1.04 | 43.7      |
| AGT1 | 28    | 34.55 | 51.21  | 7.45 | 6.18  | 6.61 | 12.1  | 22.05 | 51.12  | 17.18 | 20.12 | 3.88  | 2.55 | 0.21 | 0.16    | 10.61 | 0.96 | 49.8      |
| MH   | 26.2  | 24.09 | 48.62  | 7.45 | 18.76 | 6.08 | 12.47 | 21.63 | 53.89  | 18.11 | 22.32 | 4.68  | 2.6  | 0.22 | 0.16    | 9.59  | 0.79 | 25.35     |
| HA   | 27.4  | 22.06 | 44.2   | 7.1  | 45.66 | 6.28 | 21.55 | 34.2  | 57.6   | 18.74 | 22    | 4.97  | 2.34 | 0.32 | 0.21    | 9.7   | 1.18 | 358.4     |

**Table S5.** Correlation coefficient matrix of water quality parameters of streams.

|           | WT    | TDS         | EC          | pH          | TB          | DO    | BOD         | COD   | TA          | Cl    | TH          | Ca          | Mg    | OP   | Nitrate | Na    | K    |
|-----------|-------|-------------|-------------|-------------|-------------|-------|-------------|-------|-------------|-------|-------------|-------------|-------|------|---------|-------|------|
| WT        |       |             |             |             |             |       |             |       |             |       |             |             |       |      |         |       |      |
| TDS       | -0.57 |             |             |             |             |       |             |       |             |       |             |             |       |      |         |       |      |
| EC        | -0.61 | <b>0.98</b> |             |             |             |       |             |       |             |       |             |             |       |      |         |       |      |
| pH        | -0.67 | <b>0.86</b> | <b>0.83</b> |             |             |       |             |       |             |       |             |             |       |      |         |       |      |
| TB        | 0.00  | -0.36       | -0.29       | -0.24       |             |       |             |       |             |       |             |             |       |      |         |       |      |
| DO        | -0.65 | 0.68        | 0.63        | 0.73        | -0.09       |       |             |       |             |       |             |             |       |      |         |       |      |
| BOD       | 0.19  | -0.48       | -0.43       | -0.59       | 0.32        | -0.34 |             |       |             |       |             |             |       |      |         |       |      |
| COD       | 0.33  | -0.41       | -0.33       | -0.53       | 0.25        | -0.32 | <b>0.91</b> |       |             |       |             |             |       |      |         |       |      |
| TA        | -0.59 | <b>0.93</b> | <b>0.97</b> | <b>0.80</b> | -0.21       | 0.63  | -0.32       | -0.17 |             |       |             |             |       |      |         |       |      |
| Cl        | 0.30  | -0.13       | -0.04       | -0.03       | 0.18        | -0.32 | 0.36        | 0.58  | 0.16        |       |             |             |       |      |         |       |      |
| TH        | -0.65 | <b>0.96</b> | <b>0.99</b> | <b>0.82</b> | -0.23       | 0.63  | -0.37       | -0.29 | <b>0.98</b> | 0.01  |             |             |       |      |         |       |      |
| Ca        | -0.66 | <b>0.95</b> | <b>0.98</b> | <b>0.80</b> | -0.21       | 0.63  | -0.36       | -0.30 | <b>0.97</b> | -0.01 | <b>1.00</b> |             |       |      |         |       |      |
| Mg        | -0.61 | <b>0.97</b> | <b>0.99</b> | <b>0.87</b> | -0.30       | 0.61  | -0.38       | -0.28 | <b>0.97</b> | 0.07  | <b>0.98</b> | <b>0.96</b> |       |      |         |       |      |
| OP        | -0.22 | -0.33       | -0.29       | -0.27       | 0.67        | 0.25  | 0.27        | 0.21  | -0.22       | -0.29 | -0.26       | -0.23       | -0.34 |      |         |       |      |
| Nitrate   | -0.39 | 0.25        | 0.27        | 0.36        | 0.69        | 0.37  | 0.19        | 0.13  | 0.29        | 0.12  | 0.30        | 0.29        | 0.31  | 0.40 |         |       |      |
| Na        | 0.38  | -0.09       | -0.12       | 0.18        | 0.09        | 0.09  | -0.28       | 0.02  | -0.04       | 0.38  | -0.18       | -0.22       | -0.05 | 0.01 | 0.12    |       |      |
| K         | 0.63  | -0.54       | -0.53       | -0.69       | 0.59        | -0.33 | 0.29        | 0.35  | -0.49       | -0.01 | -0.54       | -0.51       | -0.60 | 0.53 | 0.10    | 0.20  |      |
| Discharge | 0.23  | -0.34       | -0.31       | -0.41       | <b>0.87</b> | -0.15 | 0.50        | 0.42  | -0.22       | 0.23  | -0.23       | -0.19       | -0.33 | 0.50 | 0.54    | -0.08 | 0.71 |

**Table S6.** Loadings of 17 variables extracted from PCA.

| Variables                 | PC 1  | PC 2  | PC 3  | PC 4  |
|---------------------------|-------|-------|-------|-------|
| Water quality parameters  |       |       |       |       |
| EC                        | 0.87  | 0.26  | 0.22  | -0.22 |
| pH                        | 0.95  | 0.21  | 0.06  | 0.09  |
| TB                        | -0.43 | 0.78  | -0.28 | -0.06 |
| DO                        | 0.65  | 0.43  | -0.05 | 0.43  |
| BOD                       | -0.73 | 0.29  | 0.55  | 0.00  |
| COD                       | -0.63 | 0.23  | 0.65  | -0.01 |
| TA                        | 0.81  | 0.35  | 0.27  | -0.25 |
| TH                        | 0.84  | 0.32  | 0.20  | -0.29 |
| OP                        | -0.38 | 0.62  | -0.37 | 0.47  |
| Nitrate                   | 0.12  | 0.87  | 0.17  | 0.13  |
| Land use                  |       |       |       |       |
| BU                        | -0.61 | 0.67  | -0.05 | -0.32 |
| EF                        | 0.95  | -0.11 | -0.13 | 0.19  |
| DF                        | -0.92 | 0.26  | 0.10  | -0.23 |
| FP                        | -0.57 | -0.77 | -0.13 | 0.02  |
| Horti                     | 0.12  | -0.60 | 0.63  | 0.10  |
| Agri                      | -0.70 | 0.11  | 0.48  | 0.50  |
| Catchment characteristics |       |       |       |       |
| FlowD                     | 0.88  | 0.02  | 0.33  | 0.18  |

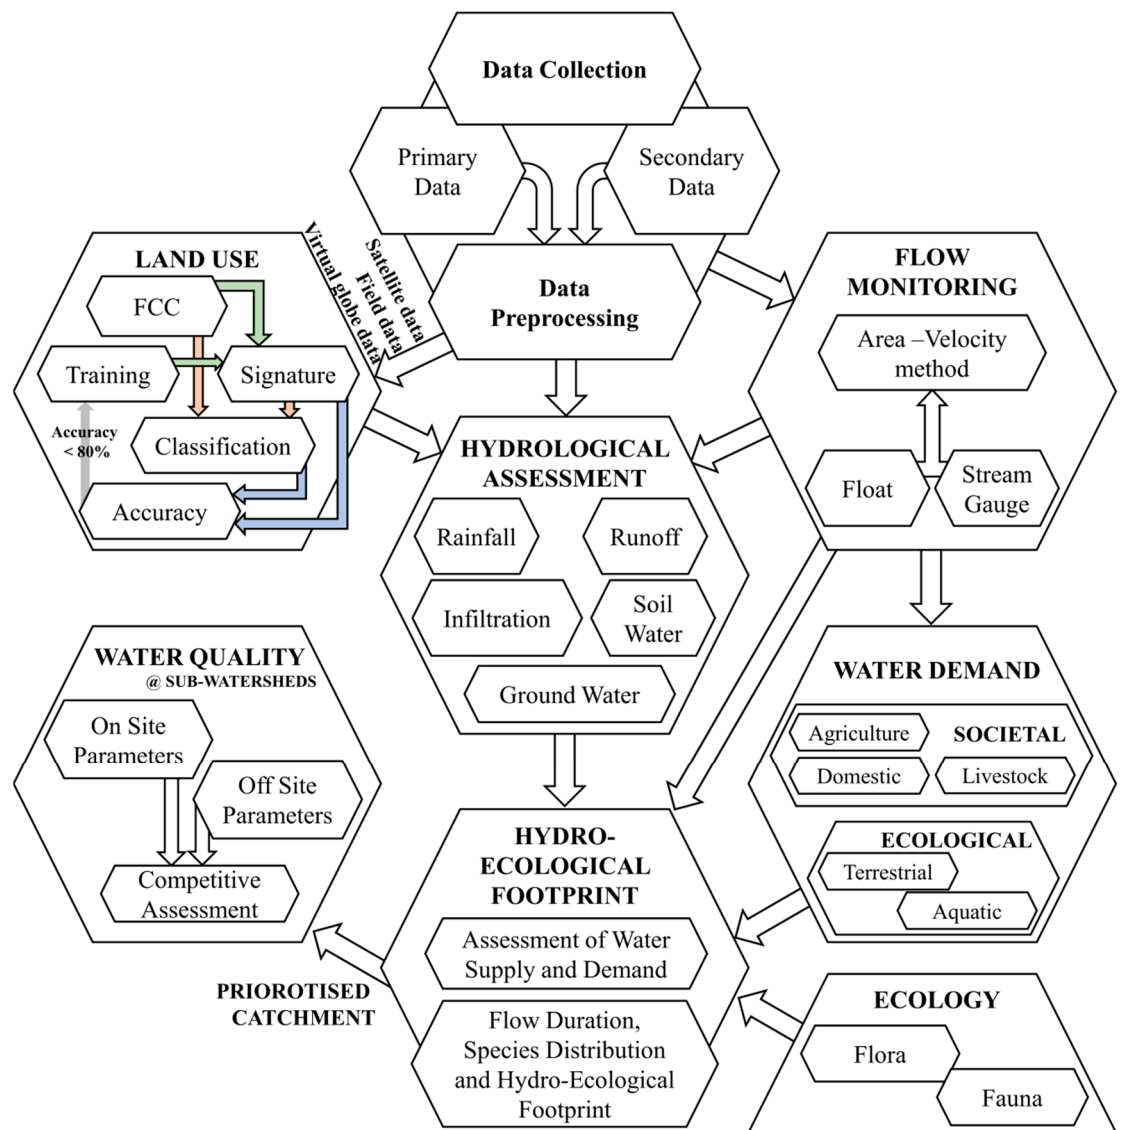

Supplementary **Figure S1**. Method for eco-hydrological and environmental regime assessment.

## References

43. Survey of India, Department of Science & Technology. Nakshe. 2018. Available online: <http://www.soinakshe.uk.gov.in/> (accessed on 11 December 2019).
45. Office of the Registrar General & Census Commissioner, The Ministry of Home Affairs. Census of India. 2011. Available online: <http://www.censusindia.gov.in> (accessed on 7 February 2017).
48. Global Precipitation Climatology Centre (GPCC). National Oceanic and Atmospheric Administration. Earth System Research Laboratory. Available online: <https://www.esrl.noaa.gov/psd/data/gridded/data.cpc.globalprecip.html> (accessed on 17 February 2019).
49. India Meteorological Department, The Ministry of Earth Sciences (MoES). Hydrometeorological Services. Available online: [http://www.imd.gov.in/pages/services\\_hydromet.php](http://www.imd.gov.in/pages/services_hydromet.php) (accessed on 15 June 2019).
50. Karnataka Government. Directorate of Economics and Statistics. 2017. Available online: <des.kar.nic.in/> (accessed on 12 September 2019).
51. Food and Agriculture Organization. Meteorological Data. 2017. Available online: <http://www.fao.org/docrep/X0490E/x0490e07.htm> (accessed on 30 January 2019).
52. Hijmans, R.J.; Cameron, S.E.; Parra, J.L.; Jones, P.; Jarvis, A.; Richardson, K. WorldClim, version 1.4. 2007. Available online: <http://www.worldclim.org> (accessed on 11 August 2019).
54. Google. Google Earth. 2018. Available online: [https://www.google.com/intl/en\\_in/earth/](https://www.google.com/intl/en_in/earth/) (accessed on 1 May 2018; 22 June 2019, 20 May 2020).
56. Mutreja, K.N. Applied Hydrology, 4th ed. Tata McGraw-Hill: New Delhi, India, 1995.
